# Supplementary material
Source: PubMed Central journal article supplement (PMC2154435)

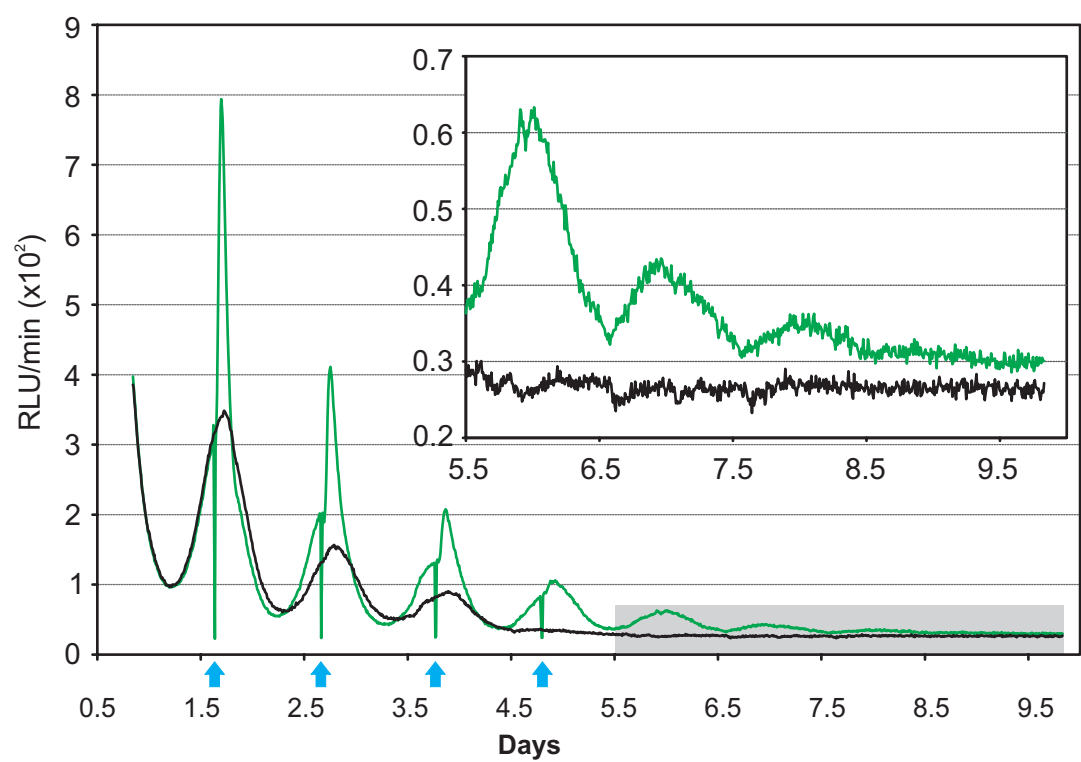

Supplement: supp_0708877104_08877Fig10.pdf [file supp_0708877104_08877Fig10.pdf]

**A**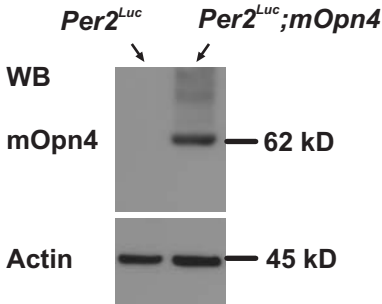

Supplement: supp_0708877104_08877Fig6A.pdf [file supp_0708877104_08877Fig6A.pdf]

**B***Per2<sup>Luc</sup>;mOpn4*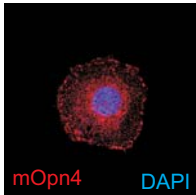*Per2<sup>Luc</sup>*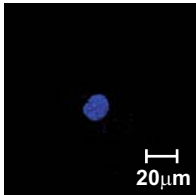

Supplement: supp_0708877104_08877Fig6B.pdf [file supp_0708877104_08877Fig6B.pdf]

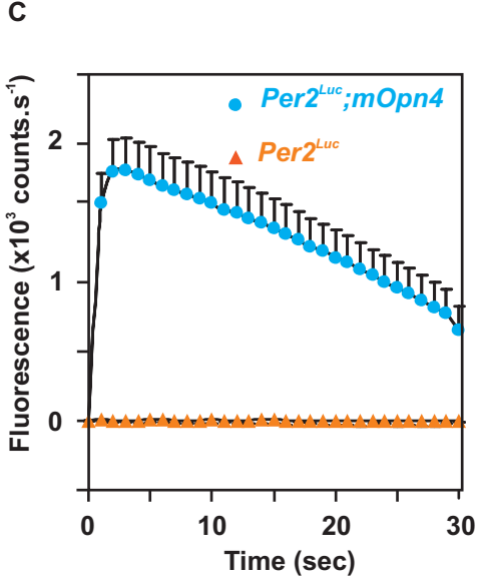

Supplement: supp_0708877104_08877Fig6C.pdf [file supp_0708877104_08877Fig6C.pdf]

**D**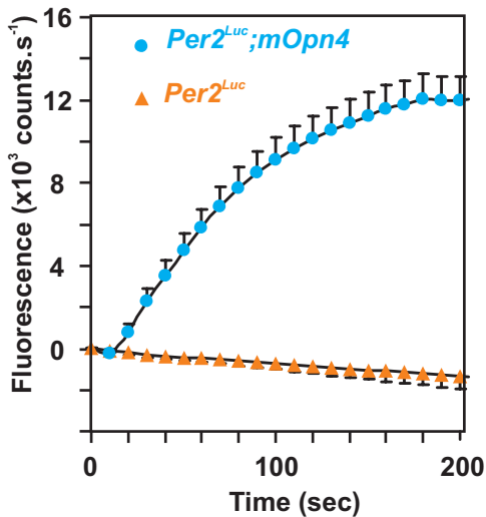

Supplement: supp_0708877104_08877Fig6D.pdf [file supp_0708877104_08877Fig6D.pdf]

**F**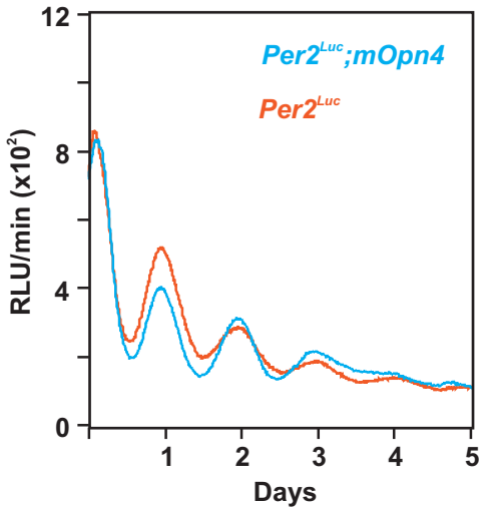

Supplement: supp_0708877104_08877Fig6E.pdf [file supp_0708877104_08877Fig6E.pdf]

F

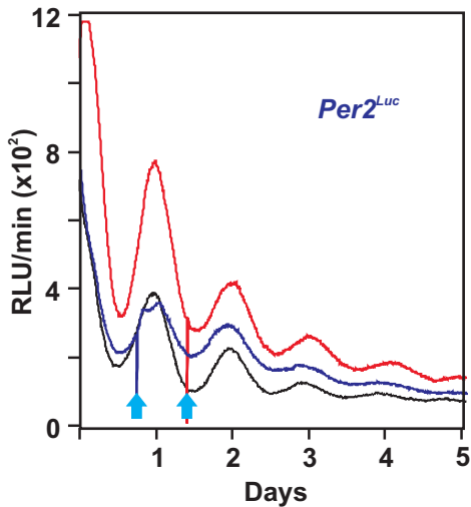

Supplement: supp_0708877104_08877Fig6F.pdf [file supp_0708877104_08877Fig6F.pdf]

Relative band intensity  
(pCREB/CREB)

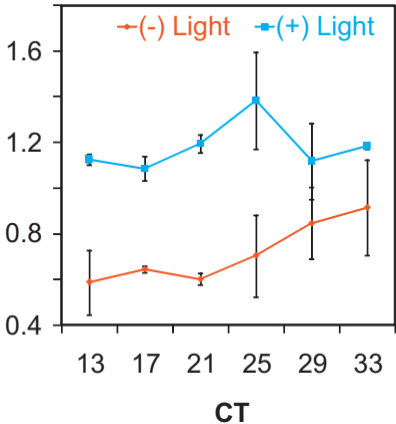

Supplement: supp_0708877104_08877Fig7.pdf [file supp_0708877104_08877Fig7.pdf]

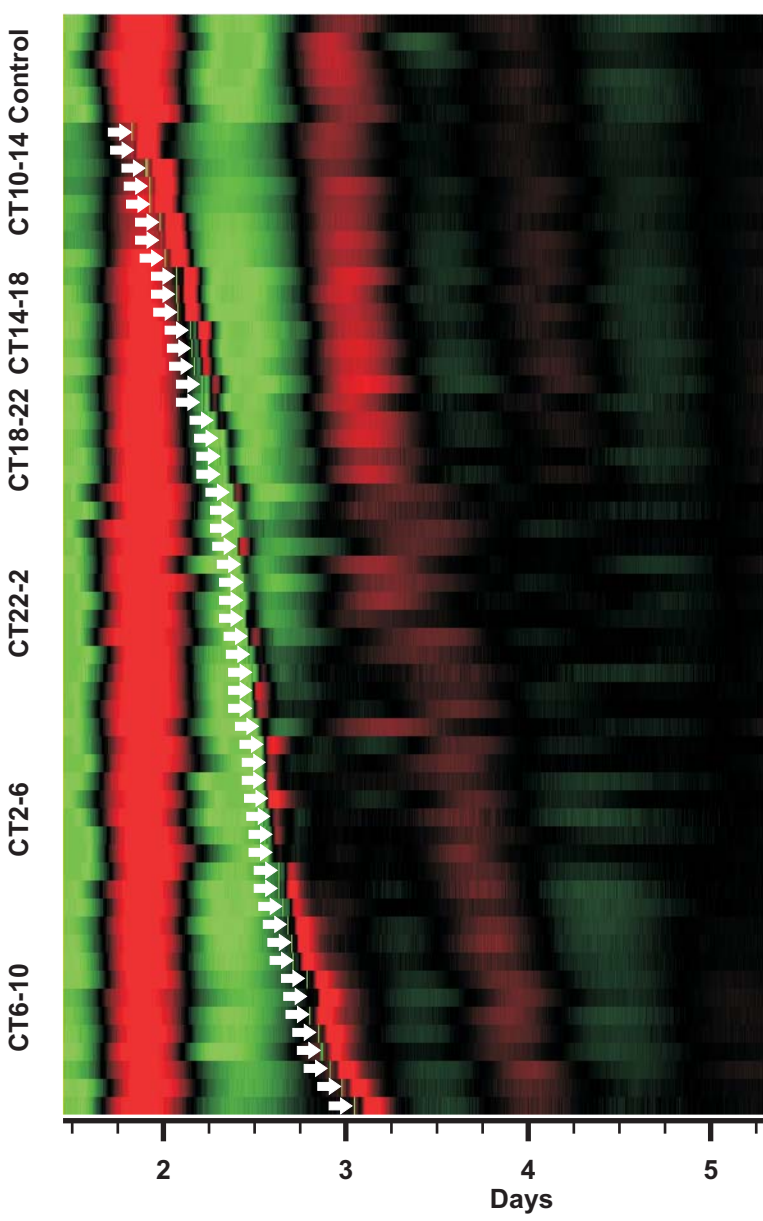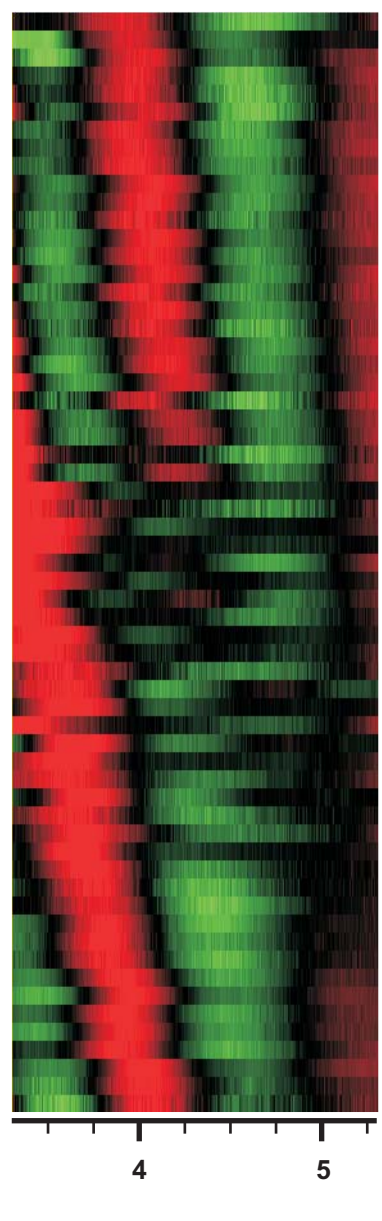

Supplement: supp_0708877104_08877Fig8.pdf [file supp_0708877104_08877Fig8.pdf]

**A**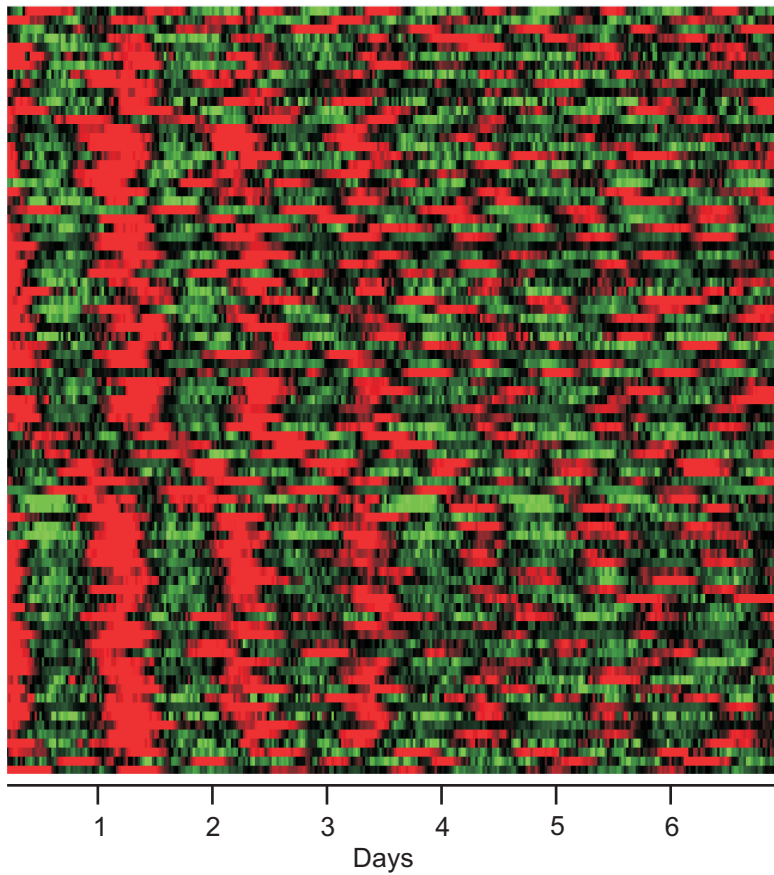

Supplement: supp_0708877104_08877Fig9A.pdf [file supp_0708877104_08877Fig9A.pdf]

**B**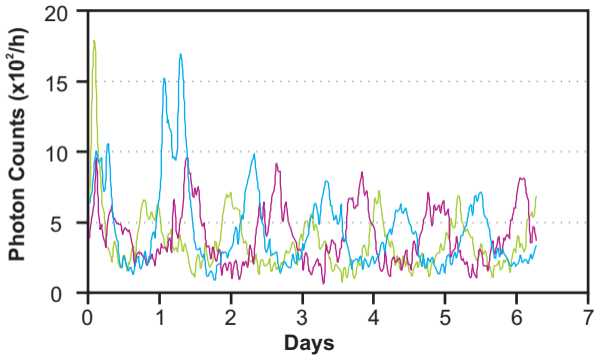

Supplement: supp_0708877104_08877Fig9B.pdf [file supp_0708877104_08877Fig9B.pdf]
